# Supplementary material
Source: PubMed Central journal article supplement (PMC4390813)
Supplement: mmc1.pdf [file mmc1.pdf]

1 **Supplemental Information for “Maintenance of motility bias during cyanobacterial**  
2 **phototaxis”**

3  
4 Rosanna Man Wah Chau<sup>1</sup>, Tristan Ursell<sup>1</sup>, Shuo Wang<sup>1</sup>, Kerwyn Casey Huang<sup>1,2,\*</sup>, and  
5 Devaki Bhaya<sup>3,\*</sup>

6  
7 <sup>1</sup>Department of Bioengineering, Stanford University, Stanford, CA 94305, USA

8 <sup>2</sup>Department of Microbiology and Immunology, Stanford University School of Medicine,  
9 Stanford, CA 94305, USA

10 <sup>3</sup>Department of Plant Biology, Carnegie Institution for Science, Stanford, CA 94305,  
11 USA

12  
13 *Running title:* Maintenance of phototactic motility bias

14  
15 *Keywords:* collective behavior, single-cell imaging, photoreceptor, Type IV pili

16  
17 \*Corresponding authors:

18  
19 Kerwyn Casey Huang  
20 Stanford University  
21 Bioengineering Department  
22 Shriram Center, Room 007, MC: 4245  
23 443 Via Ortega  
24 Stanford, CA 94305-4125  
25 Email: [kchuang@stanford.edu](mailto:kchuang@stanford.edu)

26  
27 Devaki Bhaya  
28 Carnegie Institution for Science, Department of Plant Biology  
29 260 Panama Street  
30 Stanford, CA 94305  
31 Phone: (650) 325-1521 x282  
32 Email: [dbhaya@stanford.edu](mailto:dbhaya@stanford.edu)

33 **Supplementary Figures**

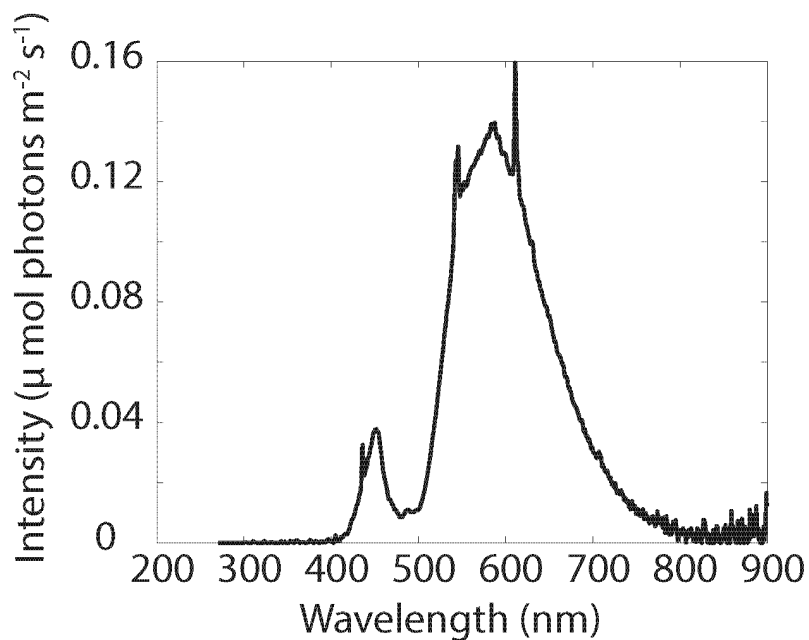

34 **Supplementary Figure 1: Spectrum for the warm-white LED used in our**  
35 **experiments.**  
36

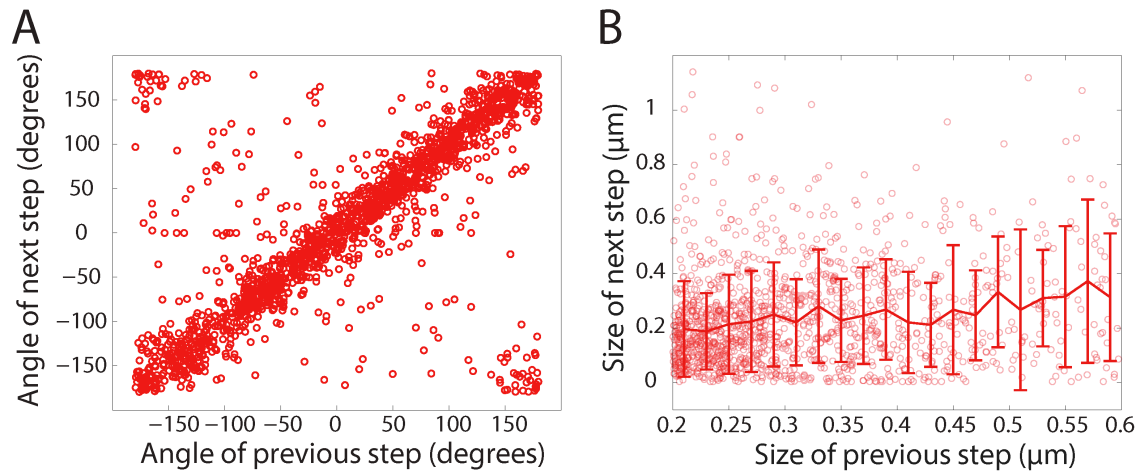

37  
38  
39  
40  
41  
42  
43  
44

**Supplementary Figure 2: Maintenance of step angles in consecutive steps indicates progressive pilus retraction.** (A,B) Size and angle of steps following steps of length 0.2-0.6  $\mu\text{m}$  indicates (A) a high degree of correlation in the direction of movement (correlation coefficient = 0.21,  $p < 10^{-15}$ ), but (B) little correlation in the sizes of successive steps. Data were taken from the midfinger region experiencing the light-off condition in the experiment described in Fig. 3B. In (B), the data are indicated as open circles, with the mean  $\pm$  standard deviation shown as a line plot.

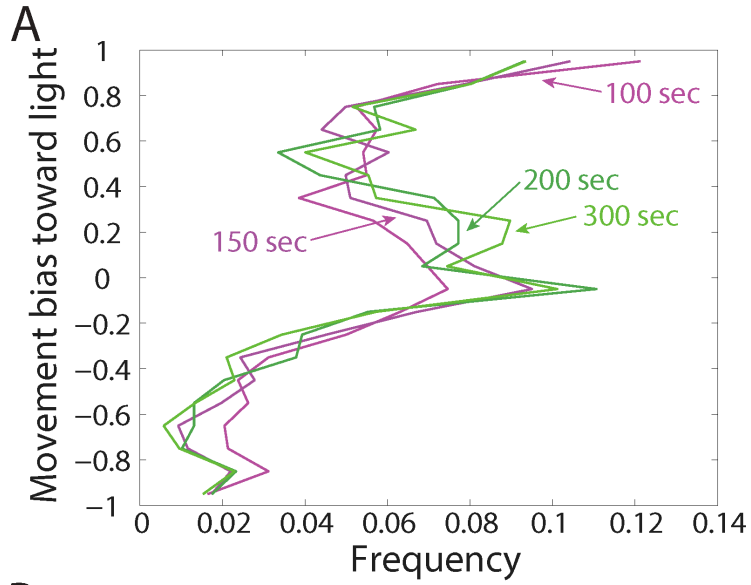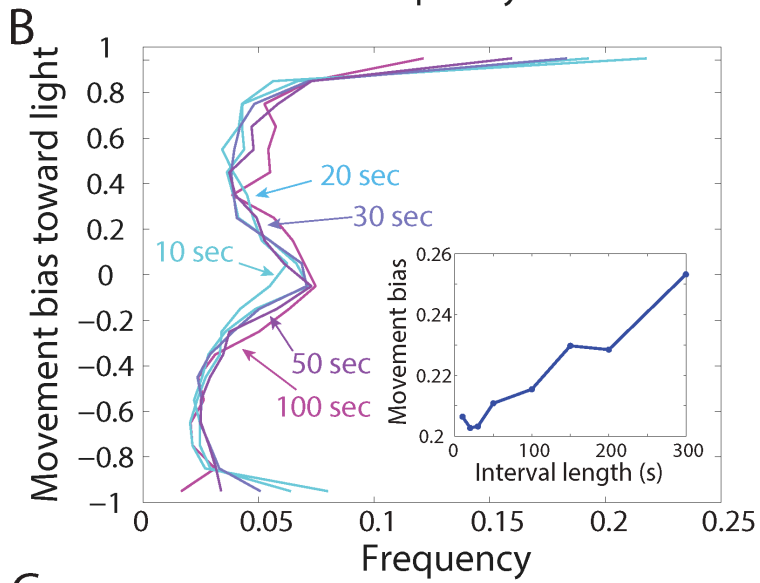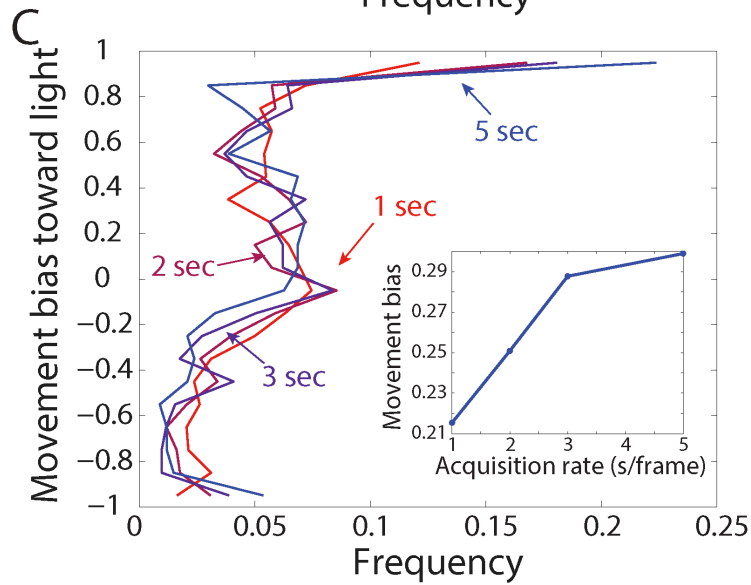

46 **Supplementary Figure 3: Long measurement intervals and high data acquisition**  
47 **frequencies are required to accurately measure motility bias.** In each case, we plot  
48 the distribution of the motility bias values of cells at the front of an inoculation of wild-  
49 type cells, averaged over all measurements obtained from a 600-s movie with frames  
50 taken every second. (A) The distribution of bias values for windows  $\geq 100$  s. (B) Shorter  
51 windows for measuring bias resulted in increased fractions of cells moving processively  
52 (with bias close to 1). (C) Data acquisition frequencies  $< 1$  frame/s (achieved by ignoring  
53 frames from the same movie) resulted in increased fractions of cells with bias close to 1.  
54 The average bias for each curve is plotted in the insets in (B) and (C).

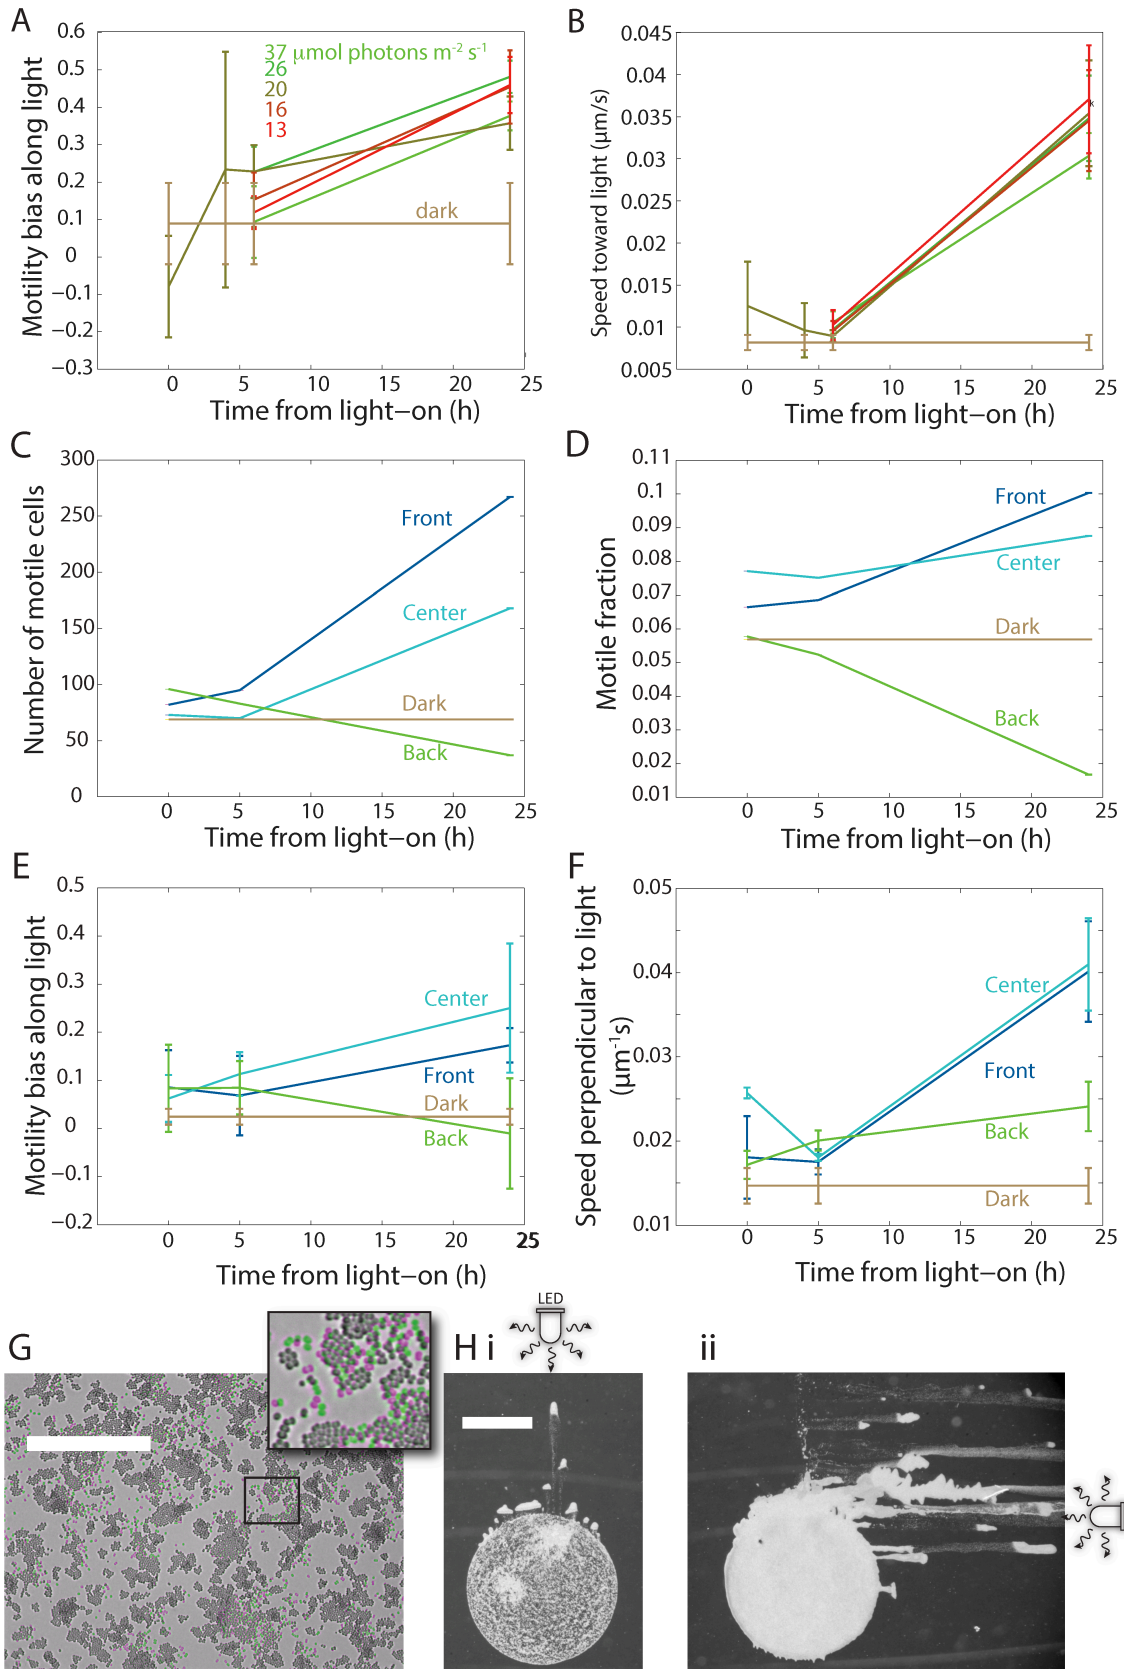

55  
56

**Supplementary Figure 4: Cells at the back of the drop are persistently stationary.**

57 (A,B) Over time, the motility bias and speed of cells in the front region of the inoculation  
58 were not strongly affected by the intensity of incident light. (C-F) Cells in an inoculation  
59 were imaged at  $t = 0, 4, 6,$  and  $24$  h after inoculation, at the back, center, and front  
60 regions. Cells were imaged in the dark at  $t = 0$  as a control and plotted across time as a  
61 reference line. (C) Number of motile cells. (D) Fraction of cells that were classified as  
62 motile. (E) Motility bias over time. (F) Speed perpendicular to the light direction. The  
63 motility bias differed between the back, center, and front regions, but speed increased  
64 over time in all regions. However, the number of motile cells remained the same in the  
65 back, while the fraction of motile cells decreased over time due to increased cell numbers  
66 from division. Therefore, the increase in motile cell fraction in the center and front cannot  
67 be attributed entirely to EPS accumulation. As motile cells moved out of the back of the  
68 drop, non-motile cells were left behind. (G) Overlay of two time-lapse images, 10 min  
69 apart, of cells in the back region. Cells that have moved over the 10 min are highlighted,  
70 with their original position in green and the final position in magenta. Cells that did not  
71 move remain in gray-scale. Very few cells were motile in this region. Scale bar =  $20 \mu\text{m}$ .  
72 (H) Demonstration that the cells in the back region were mostly non-motile, by observing  
73 the long-term effects of rotating the light source  $90^\circ$  relative to the drop. (i) An  
74 inoculation was subject to rotation of the light source  $90^\circ$  relative to the original incident  
75 direction. (ii) Ninety-six hours later, new fingers extended from most regions of the  
76 original inoculation and existent fingers, except for the back of the drop. Scale bar =  $1$   
77 mm.

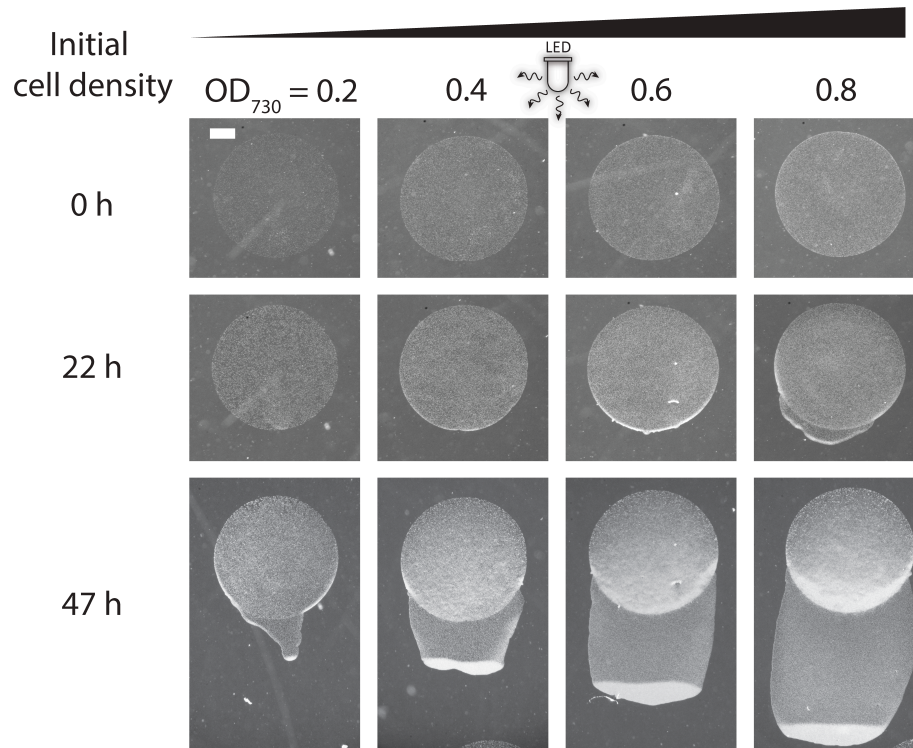

78

79

80

81

82

83

84

**Supplementary Figure 5: *taxDI* cells form a single, wide front across a wide range of initial cell densities.** Time-lapse of *taxDI* cells deposited on an agarose surface with increasing initial cell densities. Light was incident from the top of the figure. Cell density was quantified by optical density (OD) at 730 nm. The lack of well-separated, finger-like projections contrasted those observed in communities of wild-type cells (Fig. 1A). Scale bar = 1 mm.
